# Supplementary material
Source: publisher figshare collection journal article supplement (https://brill.figshare.com/ndownloader/files/32632838)
Supplement: Supplementary file 1 [file 32632838]

| Species | n  (Holotype, paratype(s)) | L (mm) | a | b | c | V | V' | Max. diam. | Pharynx | Tail | Head to vulva | Stoma | Egg length | Egg diam. | Host | Distribution |
| --- | --- | --- | --- | --- | --- | --- | --- | --- | --- | --- | --- | --- | --- | --- | --- | --- |
| *R. alatum*  Hunt, 1994 | Holotype  (9 paratypes) | 1.91  (1.80 ± 0.08 (1.67-1.91)) | 11.7  (10.8 (9.8-12.6)) | 4.1  (4.1 (3.8-4.4)) | 19.9  (13.8 (11.5-19.9)) | 55.4  (61.5 (55.4-64.1)) | – | 163  (167 ± 13 (143-195)) | 468  (438 ± 34 (403-504)) | 96  (130 ± 18 (96-156)) | 1.06  (1.10 ± 0.06 (1.03-1.17)) | – | – | – | ? *Polyconoceras* sp. | Bubia ARC, Lae, Morobe Province, Papua New Guinea. |
| *R. artigasi*  Coy Otero, García & Alvarez, 1993 | Allotype  (4 paratypes) | 1.68  (1.40-2.03) | 11.28a | – | 9.88a | 65.48a | 72.85a | 149  (149-195) | 431  (383-475)a | 170  (180-221) | 1.10  (1.22-1.81)a | 34  (34-44) | 160-170  (129-160) | 95  (92-95) | *Rhinocricus davernoyi* Karsch, 1881 | Loma El Salón, Sierra del Rosario, Provincia de Pinar del Río, Cuba |
| *R. bravoae*  Sánchez-Velázquez, 1981 | 9 | 2.234-2.328 | 7.16-12.62a | – | 45.59-103.77a | – | – | 177-325 | 368-421 | 246-319 | – | 32-36 | 102-127 | 53-110 | *Hiltonius carpinus* (Chamberlain); posterior intestine | Cerro del Tepozteco, Tepztlán, Morelos, Mexico |
| *R. bravoae*  Sánchez-Velázquez, 1981 (neotype, plus paraneotypes) | 12 | 2.08 ± 0.34  (1.1-2.35) | 13 ± 3  (9-18) | 5.8 ± 1.1  (3.5-7.4) | 8.2 ± 0.8  (6.3-9.3) | 67.5 ± 8.3  (62.2-93.1) | 73.3 ± 3.7  (62.8-77.1) | 154. ± 28.6  (123-212) | 436 ± 68.6  (312-545) | 255 ± 43.0  (147-323) | 1.4 ± 0.1  (1.0-1.6) | 52.6 ± 8.1  (38.9-70.6) | 145. ± 2.3  (128-156) | 75 ± 2.6  (63-88) | *Anadenobolus putealis* Loomis,1969 (type host) | Biosphere Reserve of Los Tuxtlas, Mexico (type locality) |
| *R. bursatum*  Spiridonov, 1989 | Allotype  (10) | 2.29  (2.208 (2.050-2.490)) | 9.90  (10.1(8.8-12.8)) | 5.0  (4.6 (4.3-5.0)) | 12.0  (12.7 (11.0-14.1)) | – | – | – | – | – | – | – | 149-172  (n = 25) | 65-90 | *Rhinocricus* sp. | Guantanamo Province, Cuba |
| *R. bursatum*  Spiridonov, 1989 (additional data from Hunt, 1994) | 9 | 2.40 ± 0.23  (1.92-2.74) | 10.9  (7.8-14.4) | 4.3  (3.8-4.8) | 13.8  (12.6-14.4) | 64.0  (60.4-66.4) | – | 221 ± 43  (176-293) | 553 ± 32  (501-614) | 174 ± 16  (143-195) | 1.54 ± 0.15  (1.22-1.75) | – | – | – | *Rhinocricus* sp. | Topotype material |
| *R. christiei* Dollfus, 1952 | 2 | 1.724, 1.70 | 11.49, 11.34, 10.30a | – | – | 66.36, 67.65a | – | 150-152, 165 | 358-374a | – | 1.144, 1.15a | – | 146-150 | 85-90 | *Rhinocricus cachoeirensis* O. Schubart | São Paulo State, Brazil |
| *R. christiei*  Dollfus, 1952 [Redescription; Adamson 1983 p.123] | 10 | 1.73-1.93 | 14.91-13.40 | – | 11.35-15.04 | 64.16-65.28 | 14.04-10.35 | 116-144 | 380-451a | 115-170 | 1.11-1.26 | 33-52a | 112-138 | 56-61 | *Rhinocricus cachoeirensis* | São Paulo, Brazil |
| *R. communis*  (d'Udekem, 1859) Artigas, 1930 [Measurements; Travassos & Kloss, 1965, p. 69-71] | ? | 2.140-2.441 | 14.86-15.45a | – | 14.86-15.45a | – | 71.82-111.21a | 144-158 | 419-444 | 144-158 | 1.35-1.40a | 40-48 | 156-164 | 76-96 | Posterior intestine of *Rhinocricus electrofasciatns* Schubart (types) and *R*. *nodulipes* Schubart, (Diplopoda) | Cachimbo, Pará State (types) and Urucum, Matô Grosso State, Brazil |
| *R. communis*  Travassos & Kloss, 1965 [Redescription; Adamson 1983 p.123 from paratypes] | 3 paratypes | 1.67-1.75 | 15.32-15.22a | – | 15.91-16.37a | 65.87-66.29a | 70.15-70.73a | 109-115 | 358-374a | 102-110 | 1.10-1.16a | 36-40 | 95-144 | 54-67 | *Rhinocricus electrofasciatus* Schubart (only reported this one) | Pará State, Brazil. |
| *R. habanense*  Coy Otero,García & Alvarez, 1993 | Allotype  (4 paratypes) | 2.08  (1.95-2.08) | 12.31  (11.54-11.43)a | – | 9.29  (8.74-9.56)a | 62.50  (63.33-62.50)a | 70.58-70.73a | 169  (169-182) | 477 | 224  (204-238) | 1.3  (1.235-1.300)a | 44  (37-54) | 153  (153-170) | 85 (85-102) | *Rhinocricus davernoyi* Karsch, 1881 | Bosque del Río Ariguanabo, San Antoio de los Baños, Provincia de La Habana, Cuba |
| *R. longispiculum*  Artigas,1926 [Measurements; Travassos & Kloss, 1965, p. 68-69] | ? | 1.479-1.850 | 14.64-11.08a | – | 12.67-15.73a | 29.61-35.14a | 70.42-75.16a | 101-167 | 256-377 | 94-146 | 1.041-1.200a | 20-40 | 130-164 | 95-116 | Posterior intestine of *Rhinocricus* sp. and *R.* *padbergi* Verhoeff (Diplopoda). | Angra dos Reis, Rio de Janeiro State; Presidente Epitácio, São Paulo State; Jacarepaguá and Manguinhos, Guanabara, State, Brazil |
| *R. longispiculum*  Artigas, 1926 [Redescription; Adamson 1983 p.119] | 10 | 1.80-1.90 | 14.1-15.5a | – | 13.6-18.0 | 65.5-71.6 | – | 116-135 | 352a | 100-140 | 1.18-1.36 | 38-56 | 126-163 | 54-71 | *Rhinocricus* (= *Anadenobolus padbergi* (Verhoeff, 1938),probably *padbergi* Schubart | São Paulo State, Brazil. |
| *R. longispiculum*  Artigas, 1926 Original description | 2-3 | 1.828  (1.801-1.85)a | 16.29  (15.6-17.29) | – | 13.82  (12.33-15.04) | 68.28  (67.52-68.94) | – | 112  (107-115)a | 369, 377 a | 130, 146 | 1.240  (1.216-1.263)a | 15, 15 | – | – | Intestine of myriapod (Julid). | Rio. Angra dos Reis, State, Brazil. |
| *R. macrocephalus*  (d'Udekem, 1859) Artigas, 1930b | ? | 1.00 | 5.56 | – | – | – | – | 180 | – | – | – | – | – | – | *Julus terrestris* L. | Probably South America regardless of Dollfus' claim of 1959 |
| *R. moa*  García, 1997 | Allotype  (1 paratype) | 2.028  (2.002) | 12.92  (15.88)a | – | 11.39  (13.62)a | 64.00  (66.98)a | 70.16  (72.29)a | 157  (126) | 524  (503) | 178  (147) | 1.298  (1.341) | – | 115  (126) | 63 (63) | *Rhinocricus suprenans* (Diplopoda: Spirobolida) | Meseta de El Toldo, Moa, provincia de Holguín, Cuba |
| *R. paraguayense* Adamson, 1985:882-885 | Allotype  1 paratype | 2.49  (2.73) | 10.12  (11.47)a | – | 14.48  (14.52)a | 62.65  (63.37)a | 40.12  (39.34)a | 246  (238) | 503  (511) | 172  (188) | 1.56  (1.73) | 61  (70) | 126-155 | 72-95 (n = 6) | *Rhinocricus bernardinensis* (Diplopoda) | Iguassu Falls, Paraguay |
| *R. ransomi*  Artigas, 1926 [Measurements; Travassos & Kloss, 1965, p. 67- 68] named neotypes from this material. | ? | 1.623-2.000 | 12.12-18.87a | – | 12.42-12.58a | 64.50-66.11 | – | 86-165 | 319-380 | 129-161 | 1.073-1.290a | 24-38 | 130-150 | 55-99 | *Rhinocricus* *cachoeirensis* Schubart and *R*. *punctatosfasciatus* Schubart (Diplopoda). | Remédios e Presidente Epitácio, São Paulo State; São Luiz de Cáceres, Mato Grosso State, Brazil, |
| *R. ransomi*  Artigas, 1926 Type species | 1 | 2.0 | 16.26a | 5.65a | 12.42a | 64.5a | 70.0a | 123 | 354a | 161 | 1.29a | 15 | 130 | 55 | Intestine of myriapod (Julid). | Remedios, São Paulo State, Brazil. |

**Supplementary Table S1.** Morphometrics of females of *Ransomnema* species described to date.

a Calculated from original measurements.

b Drawings had no scale.
